# Supplementary material for: Mutations in EDM2 selectively affect silencing states of transposons and induce plant developmental plasticity
Source: PubMed Central journal article supplement — Sci Rep. 2013 Apr 23;3:1701. doi: 10.1038/srep01701 (PMC3632883; doi:10.1038/srep01701), 2013-04-23
Supplement: srep01701-s1.pdf [file srep01701-s1.pdf]

*Supplementary Information for*

**Mutations in *EDM2* selectively affect silencing states of transposons and induce plant developmental plasticity**

Tokuji Tsuchiya and Thomas Eulgem\*

Institute for Integrative Genome Biology, Center for Plant Cell Biology,  
Department of Botany and Plant Sciences, University of California at Riverside,  
Riverside, CA 92521, USA

\* To whom correspondence should be addressed: Thomas Eulgem

Tel: +1 951 827 7740; Fax: +1 951 827 5155; E-mail: thomas.eulgem@ucr.edu

**Supplementary Figure S1.** Transcript levels of *EDM2* in *EDM2<sub>pro</sub>:HA-EDM2*.

**Supplementary Figure S2.** Effects of *EDM2* on transcriptional silencing in *soloLTR* and *ING5* loci.

**Supplementary Figure S3.** Melting curves for *Mu1*, *COPIA4* and *Actin8* in qRT-PCRs.

**Supplementary Figure S4.** H3K4me3 levels at *Mu1* and *COPIA4* determined by ChIP.

**Supplementary Figure S5.** H3K27me3 levels at *Mu1* and *COPIA4* determined by ChIP.

**Supplementary Figure S6.** Reduced fertility of *edm2* mutant plants documented by reduced quantity of seeds.

**Supplementary Figure S7.** Variation in the timing of floral transition of *edm2* mutant plants.

**Supplementary Figure S8.** Transcript levels of *SUVR4* and *DML3* in *edm2-2*.

**Supplementary Table S1.** No significant transcript level changes of histone H3K9, H3K27 or DNA (de-)methyltransferase genes in *edm2-2*.

**Supplementary Table S2.** Oligonucleotides used in this study.

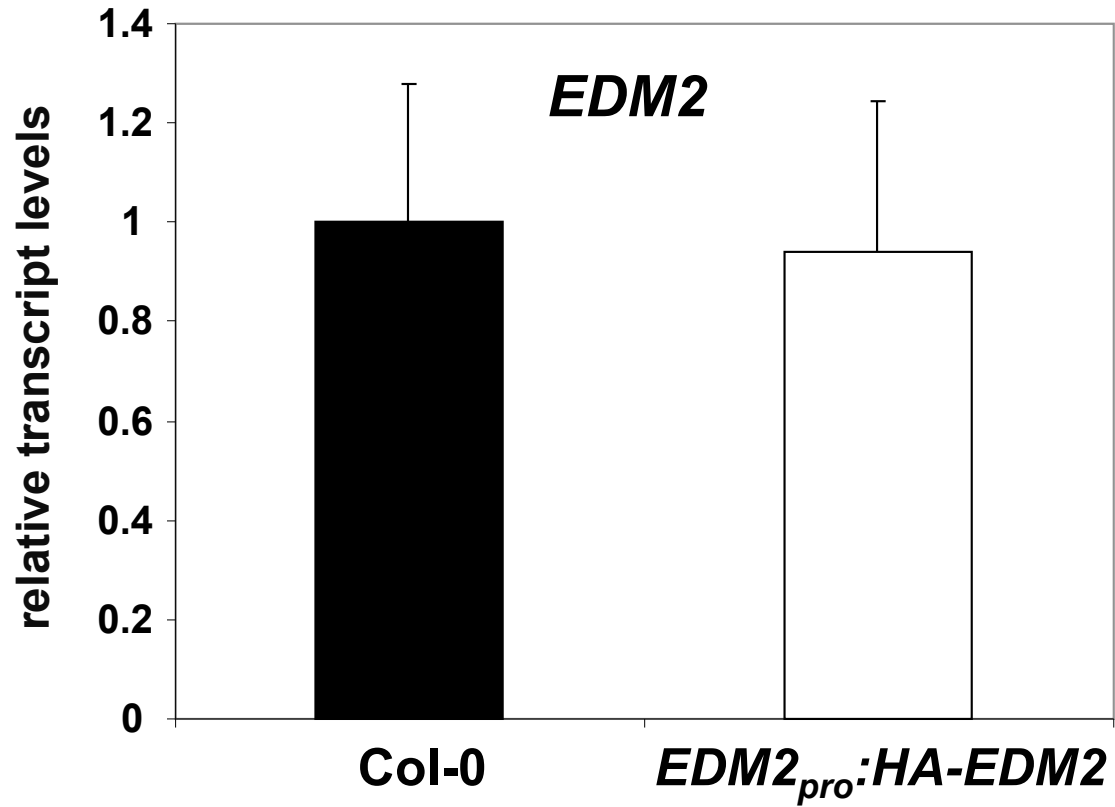

Supplementary Figure S1. Transcript levels of *EDM2* in *EDM2<sub>pro</sub>:HA-EDM2*. Transcript levels of *EDM2* were determined by qRT-PCR.

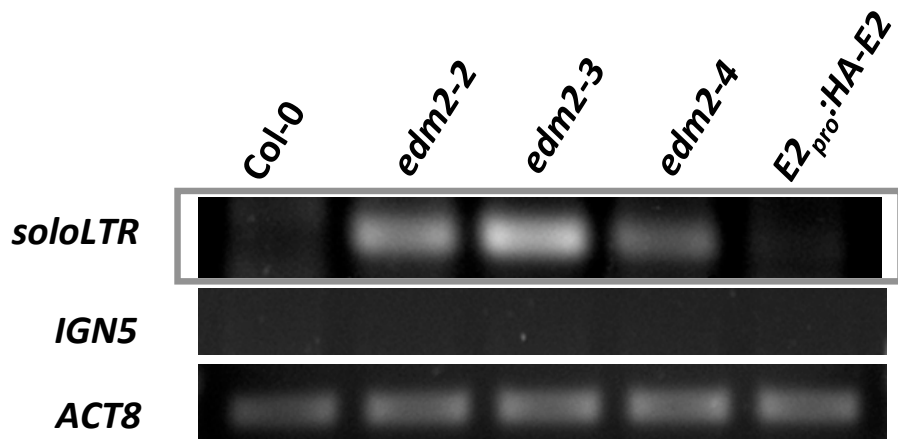

**Supplementary Figure S2. Effects of *EDM2* on transcriptional silencing in *soloLTR* and *IGN5* loci.** Transcript levels of the respective loci were determined by RT-PCR. *ACTIN 8* (*ACT8*) served as an internal control. Transcriptional repression of *soloLTR\_A* (framed by grey line) are clearly affected by *EDM2*. *E2pro:HA-E2*: *EDM2* complementation lines expressing in the *edm2-2* background HA-tagged *EDM2* driven by the native *EDM2* promoter (*E2pro*). *soloLTR*, intergenic transcript initiated from a flanking solo retroposon long terminal repeat<sup>1</sup>. *IGN5*, INTERGENIC REGION 5<sup>1</sup>.

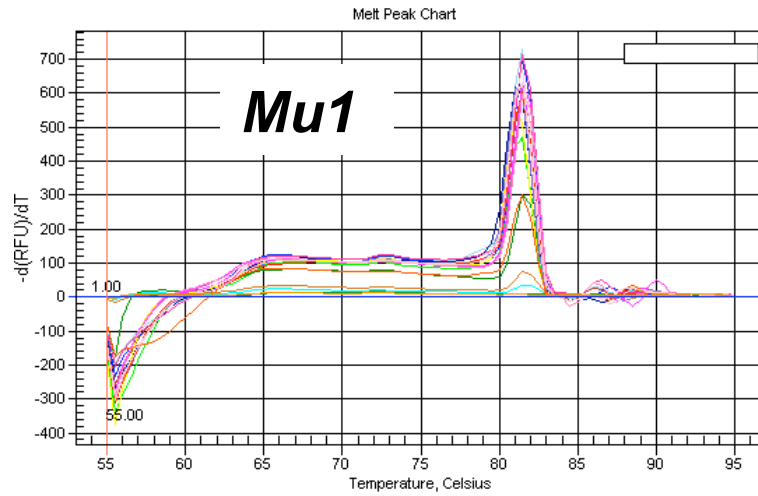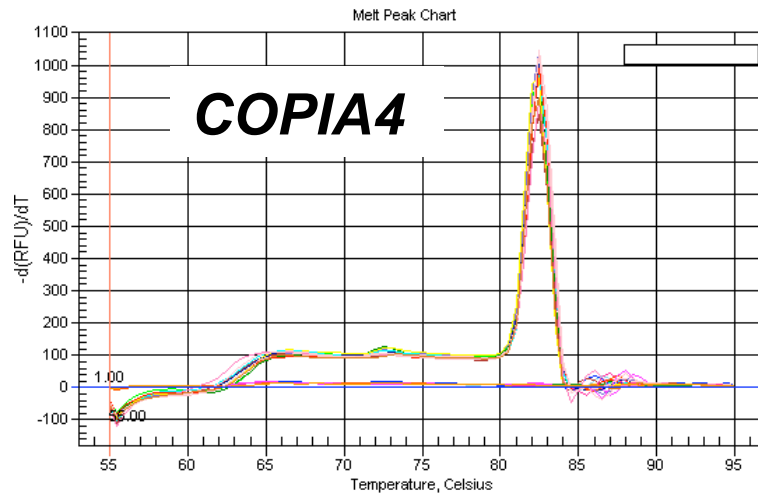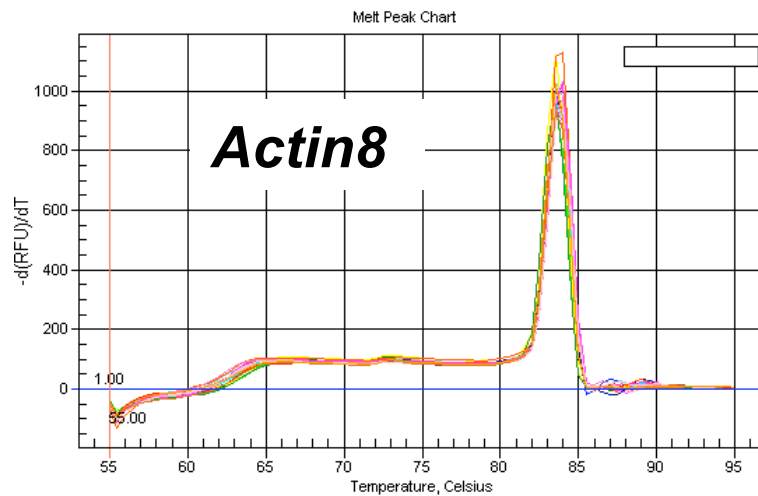

**Supplementary Figure S3. Melting curves for *Mu1*, *COPIA4* and *Actin8* in qRT-PCRs.** Melting curves were generated with PCR amplicons incorporating SYBR green dye at the end of the real-time PCR measurements shown in Figure 2a and d.

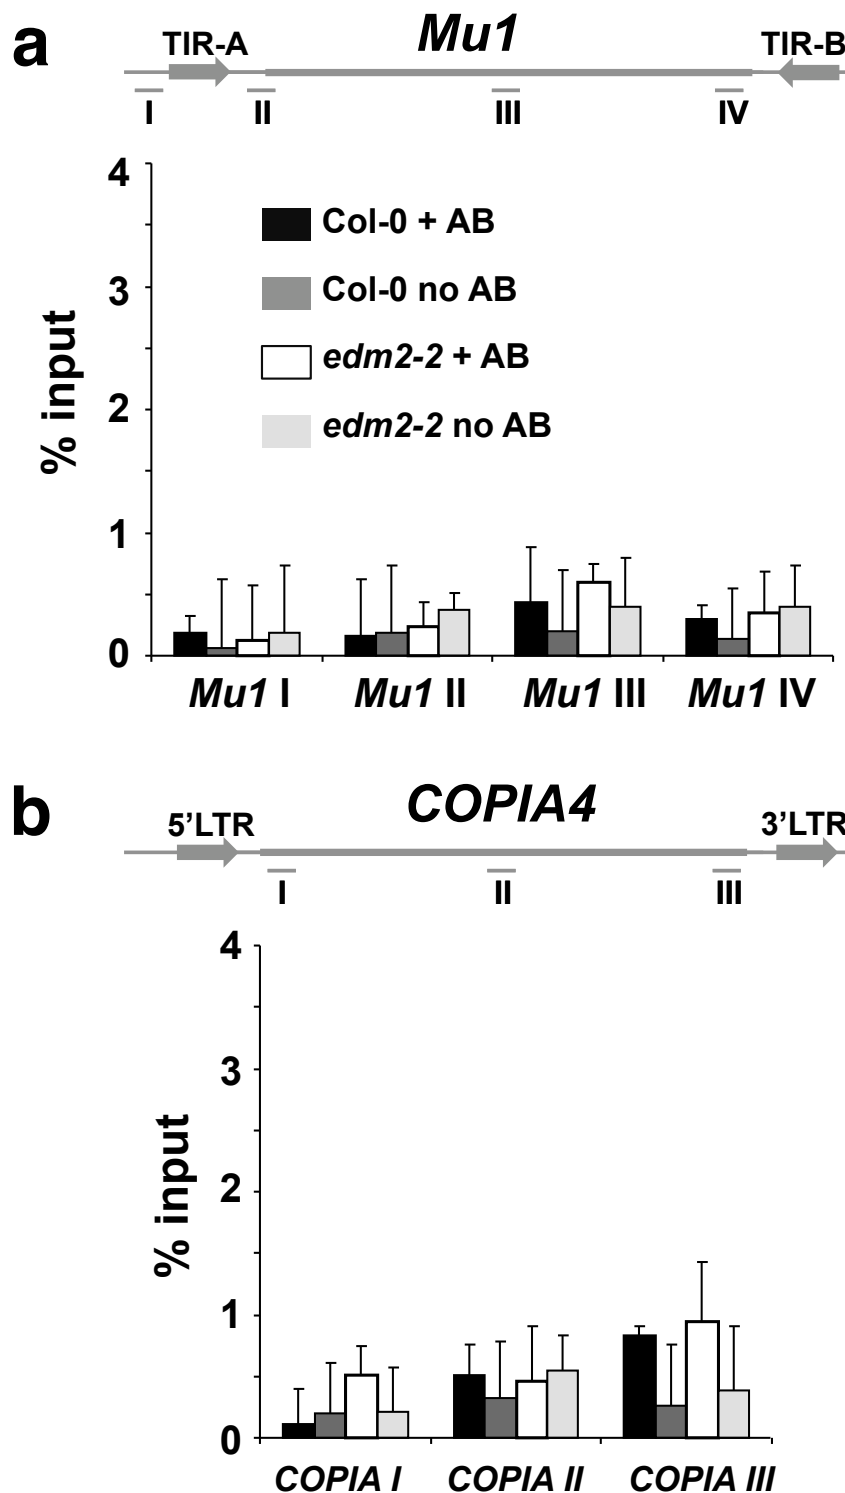

**Supplementary Figure S4. H3K4me3 levels at *Mu1* and *COPIA4* determined by ChIP.** ChIP combined with qPCR to measure H3K4me3 levels at *Mu1* (a) and *COPIA4* (b). In *Mu1* four and in *COPIA4* three different regions marked by roman numbers were tested. TIR: terminal inverted repeat, LTR: Long Terminal Repeat. Y axes in (a) and (b) represent “% input”. Two biological replicates gave similar results.

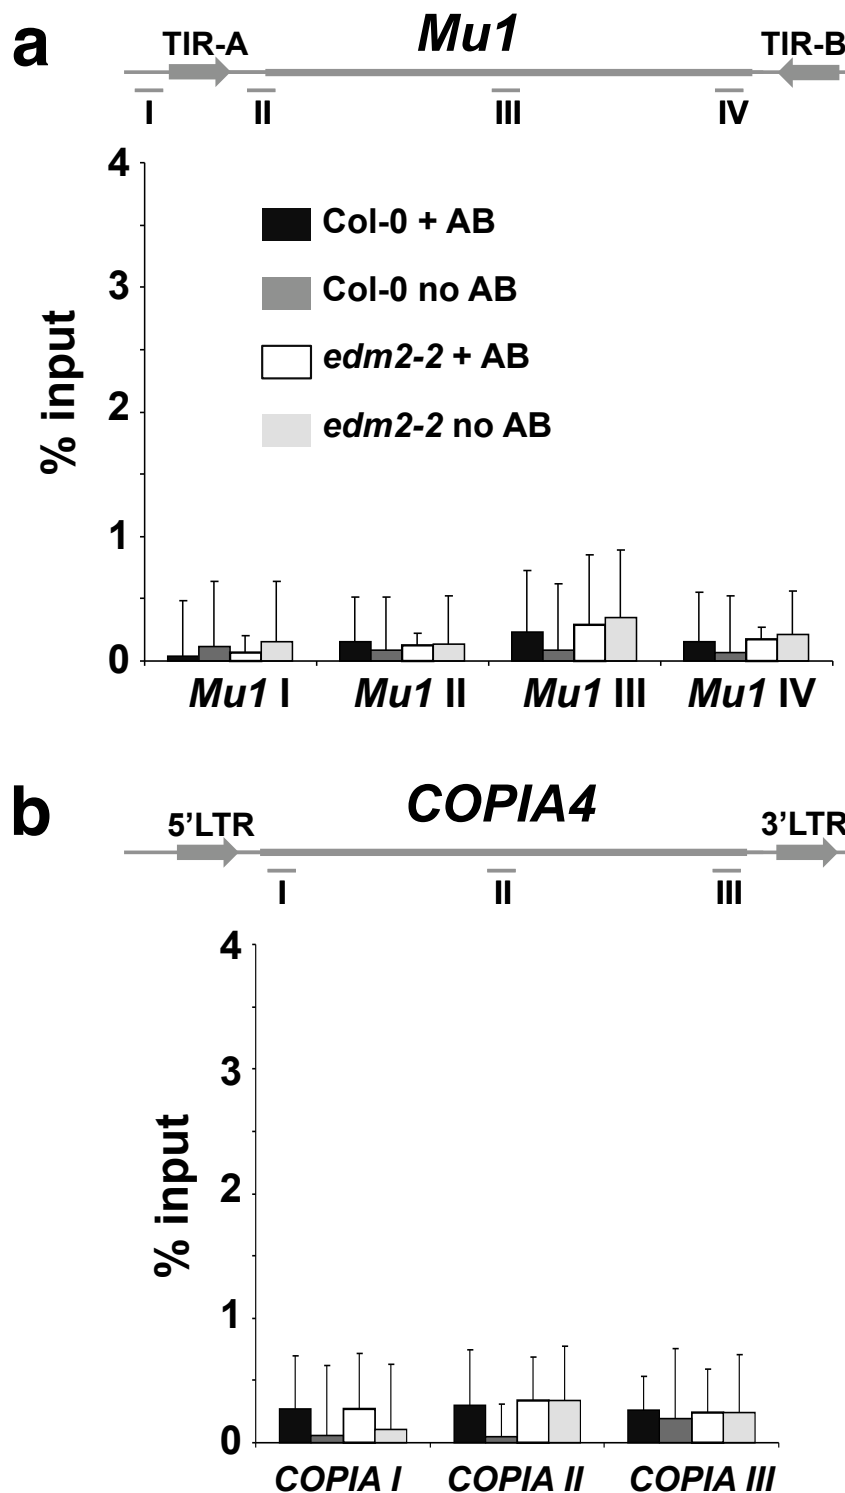

**Supplementary Figure S5. H3K27me3 levels at *Mu1* and *COPIA4* determined by ChIP.** ChIP combined with qPCR to measure H3K27me3 levels at *Mu1* (a) and *COPIA4* (b). In *Mu1* four and in *COPIA4* three different regions marked by roman numbers were tested. TIR: terminal inverted repeat, LTR: Long Terminal Repeat. Y axes in (a) and (b) represent “% input”. Two biological replicates gave similar results.

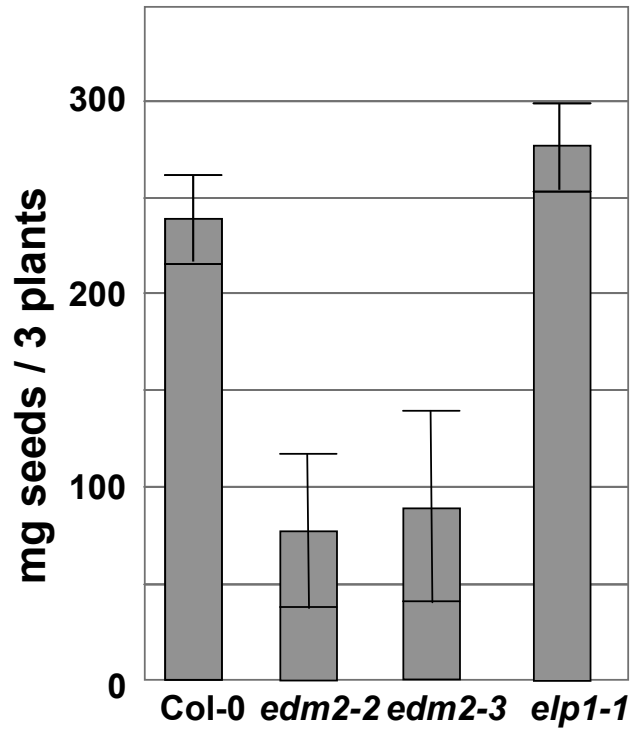

**Supplementary Figure S6. Reduced fertility of *edm2* mutant plants documented by reduced quantity of seeds.** Seeds were harvested from a bulk of 3 plants per replicate. Total of 6 replicates was taken and average weight is shown. Error bars represent standard deviations.

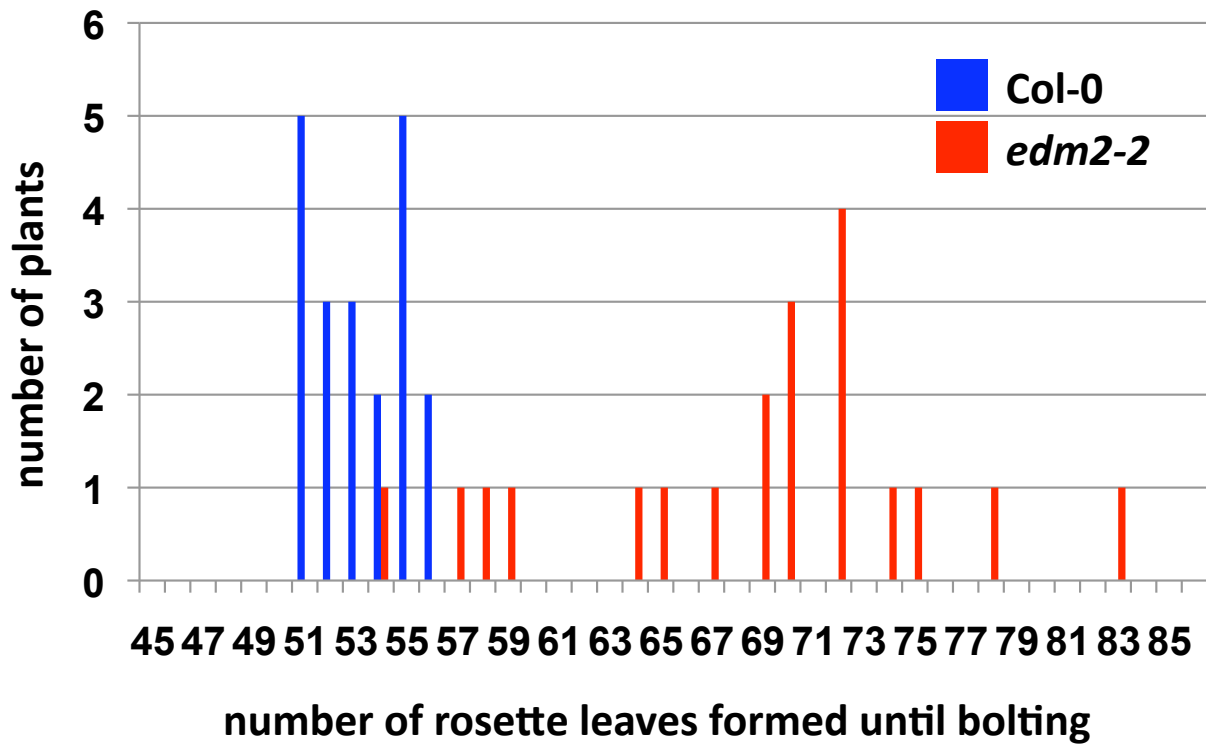

**Supplementary Figure S7.** Variation in the timing of floral transition of *edm2* mutant plants. The number of rosette leaves formed until bolting is used as a proxy for the transition from vegetative to reproductive growth. The shown data are from experiments described previously<sup>2</sup>, where they were, however, displayed as averages with Standard errors of the mean.



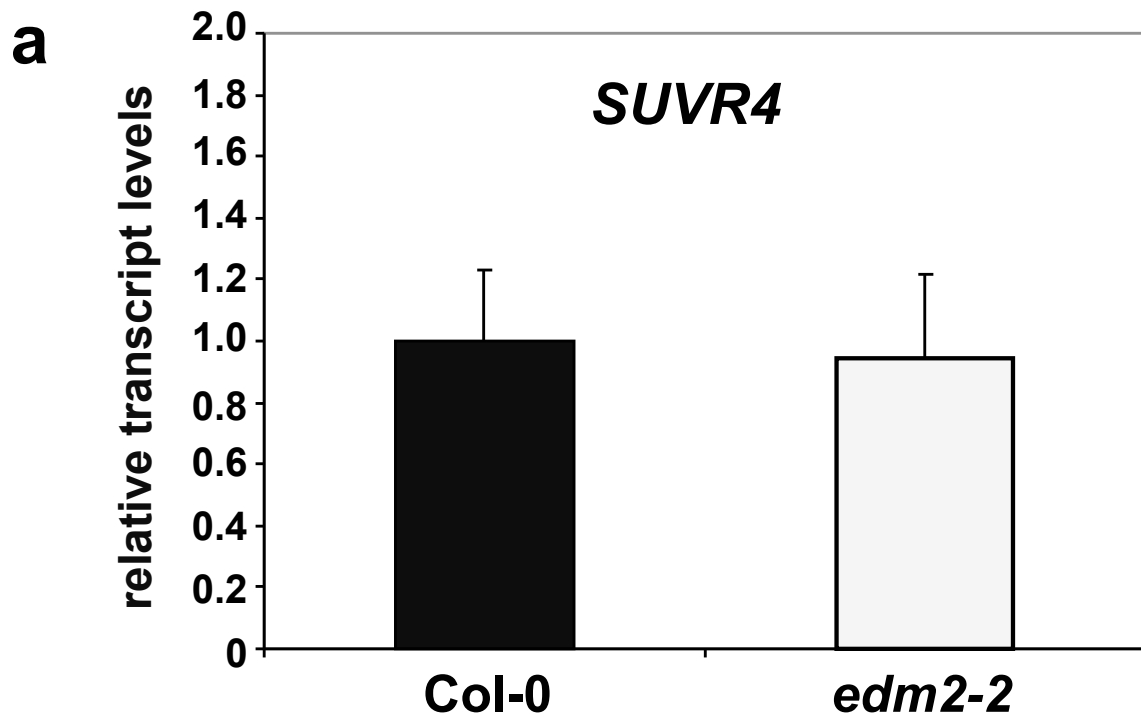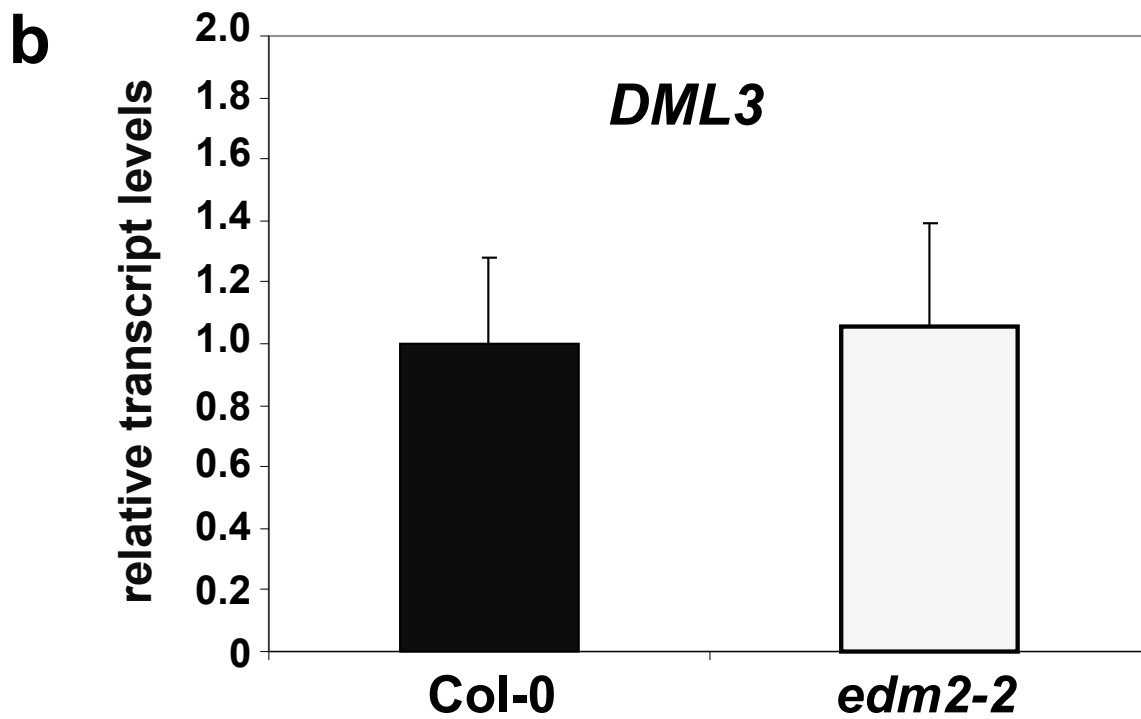

**Supplementary Figure S8. Transcript levels of *SUVR4* and *DML3* in *edm2-2*.** Transcript levels of *SUVR4* (a) and *DML3* (b) were determined by qRT-PCR.

## References for supplementary figures

1. Wierzbicki, A.T., Haag, J.R. & Pikaard, C.S. Noncoding transcription by RNA polymerase Pol IVb/Pol V mediates transcriptional silencing of overlapping and adjacent genes. *Cell* **135**, 635-48 (2008).
2. Tsuchiya, T. & Eulgem, T. The Arabidopsis defense component EDM2 affects the floral transition in an FLC-dependent manner. *Plant J* **62**, 518-28 (2010).

**Supplementary Table S1**

| Gene                                                    | AGI number | ATH1 probe        | Fold change | P-value (FDR) |
|---------------------------------------------------------|------------|-------------------|-------------|---------------|
| <b>H3K9 methyltransferases and demethylase</b>          |            |                   |             |               |
| <i>KYP/SUVH4</i>                                        | AT5G13960  | 250212_at         | 1.1278      | 0.5288        |
| <i>SUVH5</i>                                            | AT2G35160  | 266539_at         | 0.9238      | 0.8010        |
| <i>SUVH6</i>                                            | AT2G22740  | 265347_at         | 1.0910      | 0.8801        |
| <i>SUVR4</i>                                            | AT3G04380  | no probes on ATH1 |             |               |
| <i>SUVR5</i>                                            | AT2G23740  | 267290_at         | 1.1398      | 0.7869        |
|                                                         |            | 267291_at         | 1.0573      | 0.9144        |
|                                                         |            | 267292_at         | 0.9851      | 0.9709        |
| <i>SUVH2</i>                                            | AT2G33290  | 255796_at         | 1.0787      | 0.8270        |
| <i>IBM1</i>                                             | AT3G07610  | 259252_at         | 1.0261      | 0.9487        |
| <b>H3K27me1 methyltransferases</b>                      |            |                   |             |               |
| <i>ATXR5</i>                                            | AT5G09790  | 250492_at         | 1.0654      | 0.7945        |
| <i>ATXR6</i>                                            | AT5G24330  | 249788_at         | 1.1307      | 0.4572        |
| <b>DNA methyltransferases, demethylases and related</b> |            |                   |             |               |
| <i>MET1</i>                                             | AT5G49160  | 248597_at         | 0.9717      | 0.9471        |
| <i>CMT3</i>                                             | AT1G69770  | 260417_at         | 1.2581      | 0.2309        |
| <i>DRM2</i>                                             | AT5G14620  | 250139_at         | 0.9797      | 0.9694        |
|                                                         |            | 250140_at         | 0.8686      | 0.6982        |
| <i>DRM3</i>                                             | AT3G17310  | 258416_at         | 1.2473      | 0.5781        |
| <i>DME</i>                                              | AT5G04560  | 250834_at         | 1.0289      | 0.9130        |
|                                                         |            | 250835_at         | 1.1950      | 0.5535        |
|                                                         |            | 250836_at         | 1.0771      | 0.9418        |
| <i>ROS1</i>                                             | AT2G36490  | 263909_at         | 1.1341      | 0.7536        |
| <i>DML2</i>                                             | AT3G10010  | 258931_at         | 0.9673      | 0.9189        |
| <i>DML3</i>                                             | AT4G34060  | no probes on ATH1 |             |               |
| <i>ROS3</i>                                             | AT5G58130  | 247849_at         | 1.1278      | 0.6582        |

P-value (FDR): False Discovery Rate adjusted P-value.

No significant changes of transcript levels in *edm2-2* are represented by P-values > 0.05).

**Supplementary Table S2.** Oligonucleotides used in this study.

| Primer name                                                    | Sequences (5'→3')                                             | Comments                                                                                                 |
|----------------------------------------------------------------|---------------------------------------------------------------|----------------------------------------------------------------------------------------------------------|
| <b>Primers for genotyping of T-DNA mutants</b>                 |                                                               |                                                                                                          |
| <b>SALK_0145<br/>20 LP</b>                                     | TAGCCGTCTTGTGACACAGTG                                         | <i>edm2-2</i> genotyping                                                                                 |
| <b>SALK_0145<br/>20 RP</b>                                     | CCGATGAAGATGAATTGGATG                                         | <i>edm2-2</i> genotyping                                                                                 |
| <b>SALK_1459<br/>92 LP</b>                                     | ATCGCCATTGTAGGTGAAGTG                                         | <i>elp1-1</i> genotyping                                                                                 |
| <b>SALK_1459<br/>92 RP</b>                                     | TCTTCTTTACCTTGATCCATCG                                        | <i>elp1-1</i> genotyping                                                                                 |
| <b>SALK_0414<br/>74 LP</b>                                     | ACTGGTGAACCAGCTGGTATG                                         | <i>kyp-6</i> genotyping                                                                                  |
| <b>SALK_0414<br/>74 RP</b>                                     | TGAGGGGTACCTGTTCAATTG                                         | <i>kyp-6</i> genotyping                                                                                  |
| <b>LB salk</b>                                                 | ACCACCATCAAACAGGATTTTC                                        | T-DNA left border primer for SALK lines                                                                  |
| <b>Primers for <i>EDM2<sub>pro</sub>:HA-EDM2</i> construct</b> |                                                               |                                                                                                          |
| <b>HA:EDM2G<br/>W-F1</b>                                       | ATGTACCCATACGATGTTCCAGATTACGCTATGACGTTTCGTTGACG<br>ATGA       | Amplify full-length <i>EDM2</i> cDNA containing the HA-tag sequence. Used with EDM2GW-R in primary PCR   |
| <b>HA:EDM2G<br/>W-F2</b>                                       | GGGGACAAGTTTGTACAAAAAAGCAGGCTTCACAATGTACCCATAC<br>GATGTTCCAGA | Amplify full-length <i>EDM2</i> cDNA containing the HA-tag sequence. Used with EDM2GW-R in secondary PCR |
| <b>EDM2GW-R</b>                                                | GGGGACCACTTTGTACAAGAAAGCTGGGTCCTAGTCATTAATCCAA<br>CCGCC       | Amplify full-length <i>EDM2</i> cDNA containing the HA-tag sequence.                                     |
| <b>NOS<sub>term</sub>-F</b>                                    | AAA <u>ACTAGTGA</u> ATTTCCCGATCGTTCAAACAT                     | Amplify NOS terminator sequence. Contains <u>SpeI</u> site.                                              |
| <b>NOS<sub>term</sub>-R</b>                                    | AAGAGCTCAGTAACATAGATGACACCGCGC                                | Amplify NOS terminator sequence. Contains <u>SacI</u> site.                                              |
| <b>EDM2<sub>pro</sub>-F</b>                                    | AAAAAAGCTTGAAGCAGCTAACGAATAGAGCA                              | Amplify native <i>EDM2</i> promoter sequence. Contains <u>HindIII</u> site.                              |
| <b>EDM2<sub>pro</sub>-R</b>                                    | TTGGCGCGCCTCAATCCCAAATTCCCTTAACC                              | Amplify native <i>EDM2</i> promoter sequence. Contains <u>Ascl</u> site.                                 |
| <b>Primers for RT-PCR</b>                                      |                                                               |                                                                                                          |
| <b>Mu1-F</b>                                                   | TTGAATGAGGAACACATACTTG                                        | RT-PCR for <i>Mu1</i><br>Real-time PCR                                                                   |
| <b>Mu1-R</b>                                                   | GAATTAATGACTTCGCTCTTGCT                                       | RT-PCR for <i>Mu1</i><br>Real-time PCR                                                                   |
| <b>COPIA4-F</b>                                                | GCAAACGCTGCATCTGAAGTT                                         | RT-PCR for <i>COPIA4</i><br>Real-time PCR                                                                |
| <b>COPIA4-R</b>                                                | TGTTGCGAACGAAATGGTAGTC                                        | RT-PCR for <i>COPIA4</i><br>Real-time PCR                                                                |

|                       |                                   |                                                                                  |
|-----------------------|-----------------------------------|----------------------------------------------------------------------------------|
| <b>JP1565</b>         | GATTCTTACTGTAAAGAACATGGCATTGAGAGA | RT-PCR for <i>Ta3</i> <sup>1</sup><br>Real-time PCR                              |
| <b>JP1566</b>         | TCCAAATTTCTGAGGTGCTTGTAACC        | RT-PCR for <i>Ta3</i><br>Real-time PCR                                           |
| <b>SP15</b>           | AACAAAAGCATCATTCTACTTAAC          | RT-PCR for <i>CACTA1</i> <sup>2</sup>                                            |
| <b>SP40</b>           | AGGCCTACAATGGAAATGACG             | RT-PCR for <i>CACTA1</i>                                                         |
| <b>ATS15</b>          | ACCAACGTGCTGTTGGCCCAGTGGTAAATC    | RT-PCR for <i>SN1</i> <sup>3</sup>                                               |
| <b>AtSN1-F4</b>       | AAAATAAGTGGTGGTTGTACAAGC          | RT-PCR for <i>SN1</i>                                                            |
| <b>LINE1-4-F</b>      | ATATTGCAGGGGAAGAAAAACCA           | RT-PCR for <i>LINE1-4</i>                                                        |
| <b>LINE1-4-R</b>      | GACTGTGCCGTGTTGTGTGAGA            | RT-PCR for <i>LINE1-4</i>                                                        |
| <b>TSR1</b>           | CGTGAATCAAACAATGCATC              | Reverse-transcription for <i>TSI</i> <sup>4</sup>                                |
| <b>TSP1F</b>          | GAACTCATGGATACCCTAAAATAC          | RT-PCR for <i>TSI</i>                                                            |
| <b>TSP1R</b>          | CTCTACCCTTTGCATTCATGAATC          | RT-PCR for <i>TSI</i>                                                            |
| <b>IGN5_B-F</b>       | CGCAGCGGAATTGACATCCTATC           | RT-PCR for <i>IGN5</i> region B <sup>5</sup> . Used for reverse-transcription    |
| <b>IGN5_B-R</b>       | TCGGAAAGAGACTCTCCGCTAGAAA         | RT-PCR for <i>IGN5</i> region B                                                  |
| <b>soloLTR_A A221</b> | ATCAATTATTATGTCATGTTAAAACCGATTG   | RT-PCR for <i>soloLTR</i> region A <sup>5</sup> . Used for reverse-transcription |
| <b>soloLTR_A A222</b> | TGTTTCGAGTTTTATTCTCTCTAGTCTTCATT  | RT-PCR for <i>soloLTR</i> region A                                               |
| <b>FWA-F</b>          | CGACGCTGCAGAGACACTGC              | RT-PCR for <i>FLOWERING WAGENINGEN</i>                                           |
| <b>FWA-R</b>          | AGTTGAGAGTCATTGCTGTGCT            | RT-PCR for <i>FLOWERING WAGENINGEN</i>                                           |
| <b>BNS-F</b>          | TACGGCTGCATTGTTTCTACCAGTA         | RT-PCR for <i>BONSAI</i>                                                         |
| <b>BNS-R</b>          | AGGCAAAGTGCCCTCATCCAC             | RT-PCR for <i>BONSAI</i>                                                         |
| <b>RTPCR5S1</b>       | GGATGCGATCATACCAG                 | RT-PCR for <i>5S rDNA</i> <sup>6</sup>                                           |
| <b>5SUNIV2</b>        | CGAAAAGGTATCACATGCC               | RT-PCR for <i>5S rDNA</i> . Used for reverse-transcription                       |
| <b>106B-F</b>         | TTGATTGATAGATCCCTTCTGGA           | RT-PCR for <i>106B</i> repeats <sup>6</sup>                                      |
| <b>106B-R</b>         | CGAGGATGGGGTAATTGAGT              | RT-PCR for <i>106B</i> repeats. Used for reverse-transcription                   |
| <b>180(all)-F</b>     | ACCATCAAAGCCTTGAGAAGCA            | RT-PCR for 180bp centromer repeat <sup>6</sup> . Used for reverse-transcription  |
| <b>180(all)-R</b>     | CCGTATGAGTCTTTGTCTTTGTATCTTCT     | RT-PCR for 180bp centromer repeat                                                |
| <b>SUVR4-F</b>        | TATTGACCAACACGGAGTTATACGAT        | RT-PCR for <i>SUVR4</i><br>Real-time PCR                                         |

|                                         |                                     |                                                                             |
|-----------------------------------------|-------------------------------------|-----------------------------------------------------------------------------|
| <b>SUVR4-R</b>                          | TGTGATTGATAAACCTTGCGACA             | RT-PCR for <i>SUVR4</i><br>Real-time PCR                                    |
| <b>DML3-F</b>                           | TTTAAACTTTTAGACACAAGACGGAT          | RT-PCR for <i>DML3</i><br>Real-time PCR                                     |
| <b>DML3-R</b>                           | TTTGGCCCTCTCTCATCAGG                | RT-PCR for <i>DML3</i><br>Real-time PCR                                     |
| <b>EDM2-F</b>                           | CTTGGACCCCATGTTAGCTC                | RT-PCR for <i>EDM2</i><br>Real-time PCR                                     |
| <b>EDM2-R</b>                           | TTAAGAGATTATGTCCGCTAGGTT            | RT-PCR for <i>EDM2</i><br>Real-time PCR                                     |
| <b>ACT8-F1</b>                          | ATGAAGATTAAGGTCGTGGCAC              | RT-PCR for <i>ACTIN8</i>                                                    |
| <b>ACT8-R1</b>                          | GTTTTTATCCGAGTTTGAAGAGGC            | RT-PCR for <i>ACTIN8</i>                                                    |
| <b>ACT8-F2</b>                          | CAGTGTCTGGATTGGTGGTTCTATC           | RT-PCR for <i>ACTIN8</i><br>Real-time PCR                                   |
| <b>ACT8-R2</b>                          | ATCCCGTCATGGAAACGATGT               | RT-PCR for <i>ACTIN8</i><br>Real-time PCR                                   |
| <b>Primers for chop-PCR</b>             |                                     |                                                                             |
| <b>Mu1 meth-F1</b>                      | TAGGCAACTGTTTGTGGTTAAGACATC         | Chop-PCR for <i>HpyCH4IV</i><br>and <i>BglII</i> sites in <i>Mu1</i>        |
| <b>Mu1 meth-R1</b>                      | GACACCATTTTCCAACGCTCT               | Chop-PCR for <i>HpyCH4IV</i><br>and <i>BglII</i> sites in <i>Mu1</i>        |
| <b>Mu1 meth-R2</b>                      | TGGGTTTTGAGAATGAATTTCTTCAACAT       | Chop-PCR for <i>AflIII</i> site in<br><i>Mu1</i> . Used with Mu1 meth<br>F1 |
| <b>COPIA4 meth-F1</b>                   | ACCACTTTTCTGTCTATGTACTTGTCT         | Chop-PCR for <i>HpyCH4IV</i><br>and <i>BglII</i> sites in <i>COPIA4</i>     |
| <b>COPIA4 meth-R1</b>                   | TTTGTTCCGGTTGCTTCTATACCAA           | Chop-PCR for <i>HpyCH4IV</i><br>and <i>BglII</i> sites in <i>COPIA4</i>     |
| <b>COPIA4 meth-F2</b>                   | CTCACTCAAGCTTCGGTTCC                | Chop-PCR for <i>HaeIII</i> site<br>in <i>COPIA4</i>                         |
| <b>COPIA4 meth-R2</b>                   | TACTCGTAGACGCTCATAATTCGG            | Chop-PCR for <i>HaeIII</i> site<br>in <i>COPIA4</i>                         |
| <b>Primers for Bisulfite sequencing</b> |                                     |                                                                             |
| <b>Mu1 ConF1</b>                        | TTTAGTTATGGGTTGGTAATTGTA            | Bisulfite sequencing for<br><i>Mu1</i> <sup>7</sup>                         |
| <b>Mu1 ConR</b>                         | CTTCTTAACCTTCTTTTCAATCTAAA          | Bisulfite sequencing for<br><i>Mu1</i>                                      |
| <b>COPIA4-BS-F</b>                      | TTTGAAYAGAGTTTTTTCGYCGTTAGTTACG     | Bisulfite sequencing for<br><i>COPIA4</i>                                   |
| <b>COPIA4-BS-R</b>                      | ATAACTRAACCACARATTCARACCCATTTTCATTT | Bisulfite sequencing for<br><i>COPIA4</i>                                   |
| <b>Primers for ChIP</b>                 |                                     |                                                                             |
| <b>Mu1 ChIP I_F</b>                     | CACAGGTCAAGCCCTCGATT                | ChIP for <i>Mu1</i> region I                                                |
| <b>Mu1 ChIP I_R</b>                     | CAGCCCTTTTAAGATATCACTCGTTG          | ChIP for <i>Mu1</i> region I                                                |
| <b>Mu1 ChIP II_F</b>                    | GATTTTGTATTAATTTTATCTTGTTCCGA       | ChIP for <i>Mu1</i> region II                                               |
| <b>Mu1 ChIP II_R</b>                    | CGCTCTTCACTCTCTGATTCGTT             | ChIP for <i>Mu1</i> region II                                               |

|                          |                              |                                                                           |
|--------------------------|------------------------------|---------------------------------------------------------------------------|
| <b>Mu1 ChIP III_F</b>    | ACATTAGTCTGGAAATTGGCTT       | ChIP for <i>Mu1</i> region III. Also used for Chop-PCR internal control   |
| <b>Mu1 ChIP III_R</b>    | CAACTACCGAGCTTATAGAAACACC    | ChIP for <i>Mu1</i> region III. Also used for Chop-PCR internal control   |
| <b>Mu1 ChIP IV_F</b>     | AATTCCCTAAAGAGAAGGTACCGAG    | ChIP for <i>Mu1</i> region IV                                             |
| <b>Mu1 ChIP IV_R</b>     | AGCCTTCTTTTCAATCTGAGTAAGCAA  | ChIP for <i>Mu1</i> region IV                                             |
| <b>COPIA4 ChIP I_F</b>   | GCAAACAATCTTCAACATTAACACGTCT | ChIP for <i>COPIA4</i> region I                                           |
| <b>COPIA4 ChIP I_R</b>   | AGCAGGAGTCTCGATAGAACCATC     | ChIP for <i>COPIA4</i> region I                                           |
| <b>COPIA4 ChIP II_F</b>  | ATGGCTCAGACCTTACACTCACA      | ChIP for <i>COPIA4</i> region II. Also used for Chop-PCR internal control |
| <b>COPIA4 ChIP II_R</b>  | AAAGGAGGCTTCATCAAACACGAC     | ChIP for <i>COPIA4</i> region II. Also used for Chop-PCR internal control |
| <b>COPIA4 ChIP III_F</b> | GCAAACGCTGCATCTGAAGTT        | ChIP for <i>COPIA4</i> region III                                         |
| <b>COPIA4 ChIP III_R</b> | TGTTGCGAACGAAATGGTAGTC       | ChIP for <i>COPIA4</i> region III                                         |
| <b>ACT8 ChIP _F</b>      | CTAAAGAGACATCGTTTCCATGACGG   | ChIP for <i>ACT8</i>                                                      |
| <b>ACT8 ChIP _R</b>      | TCCTTAGACATCTCTCCAAACGC      | ChIP for <i>ACT8</i>                                                      |

### References for supplementary tables

1. Johnson, L., Cao, X. & Jacobsen, S. Interplay between two epigenetic marks. DNA methylation and histone H3 lysine 9 methylation. *Current biology : CB* **12**, 1360-7 (2002).
2. Kato, M., Miura, A., Bender, J., Jacobsen, S.E. & Kakutani, T. Role of CG and non-CG methylation in immobilization of transposons in *Arabidopsis*. *Current biology : CB* **13**, 421-6 (2003).
3. Herr, A.J., Jensen, M.B., Dalmay, T. & Baulcombe, D.C. RNA polymerase IV directs silencing of endogenous DNA. *Science (New York, NY)* **308**, 118-20 (2005).
4. Numa, H. *et al.* Transduction of RNA-directed DNA methylation signals to repressive histone marks in *Arabidopsis thaliana*. *EMBO J* **29**, 352-62 (2010).
5. Wierzbicki, A.T., Haag, J.R. & Pikaard, C.S. Noncoding transcription by RNA polymerase Pol IVb/Pol V mediates transcriptional silencing of overlapping and adjacent genes. *Cell* **135**, 635-48 (2008).

6. Vaillant, I., Schubert, I., Tourmente, S. & Mathieu, O. MOM1 mediates DNA-methylation-independent silencing of repetitive sequences in *Arabidopsis*. *EMBO Rep* **7**, 1273-8 (2006).
7. Zhu, J., Kapoor, A., Sridhar, V.V., Agius, F. & Zhu, J.K. The DNA glycosylase/lyase ROS1 functions in pruning DNA methylation patterns in *Arabidopsis*. *Curr Biol* **17**, 54-9 (2007).
